# Supplementary material for: Water-based synthesis of zeolitic imidazolate framework-8 for CO2 capture
Source: Royal Society of Chemistry journal article supplement (doi:10.1039/c7ra04875k), 2017-01-01
Supplement: c7ra04875k1.pdf [file c7ra04875k1.pdf]

**Electronic Supplementary information**

for

Water-Based Synthesis of Zeolitic Imidazolate Framework-8 for CO<sub>2</sub> Capture

Zhuo Shi,<sup>a</sup> Yinghao Yu,<sup>a,\*</sup> Chao Fu,<sup>b</sup> Lefu Wang,<sup>a</sup> and Xuehui Li<sup>a</sup>

a. School of Chemistry and Chemical Engineering, South China University of Technology

Guangzhou 510640, China.

b. SINTEF Energy Research, 7465 Trondheim, Norway.

\*Corresponding Author. Tel: +86 20 8711 4707, Fax: +86 20 8711 4707, E-mail: ceyhyu@scut.edu.cn.

(Yinghao Yu)

**Table S1 Synthesize ZIF-8 with different metal resources**

| Sample | Zinc source                                          | H <sub>2</sub> O/<br>Hmim | Temperature<br>/°C | Time<br>/min | pH   |
|--------|------------------------------------------------------|---------------------------|--------------------|--------------|------|
| A1     | Zn(NO <sub>3</sub> ) <sub>2</sub> ·6H <sub>2</sub> O | 15: 1                     | 25                 | 5            | 11.4 |
| B1     | Zn(OAc) <sub>2</sub> ·2H <sub>2</sub> O              | 15: 1                     | 25                 | 5            | 11.4 |
| C1     | ZnSO <sub>4</sub> ·7H <sub>2</sub> O                 | 15: 1                     | 25                 | 5            | 11.4 |
| D1     | ZnCl <sub>2</sub>                                    | 15: 1                     | 25                 | 5            | 11.4 |

**Table S2 Synthesize ZIF-8 with different pH value**

| Sample | pH   | H <sub>2</sub> O/ Hmim | Temperature<br>/°C | Time<br>/min | Zinc source                                          |
|--------|------|------------------------|--------------------|--------------|------------------------------------------------------|
| A2     | 11.4 | 15: 1                  | 25                 | 5            | Zn(NO <sub>3</sub> ) <sub>2</sub> ·6H <sub>2</sub> O |
| B2     | 13.2 | 15: 1                  | 25                 | 5            | Zn(NO <sub>3</sub> ) <sub>2</sub> ·6H <sub>2</sub> O |
| C2     | 12.5 | 15: 1                  | 25                 | 5            | Zn(NO <sub>3</sub> ) <sub>2</sub> ·6H <sub>2</sub> O |
| D2     | 10.1 | 15: 1                  | 25                 | 5            | Zn(NO <sub>3</sub> ) <sub>2</sub> ·6H <sub>2</sub> O |
| E2     | 9.4  | 15: 1                  | 25                 | 5            | Zn(NO <sub>3</sub> ) <sub>2</sub> ·6H <sub>2</sub> O |
| F2     | 11.1 | 15: 1                  | 25                 | 5            | Zn(NO <sub>3</sub> ) <sub>2</sub> ·6H <sub>2</sub> O |
| G2     | 11.9 | 15: 1                  | 25                 | 5            | Zn(NO <sub>3</sub> ) <sub>2</sub> ·6H <sub>2</sub> O |

**Table S3 Synthesize ZIF-8 with different temperature**

| Sample | Temperature<br>/°C | H <sub>2</sub> O/ Hmim | Time<br>/min | pH   | Zinc source                                          |
|--------|--------------------|------------------------|--------------|------|------------------------------------------------------|
| A3     | 25                 | 15: 1                  | 5            | 11.4 | Zn(NO <sub>3</sub> ) <sub>2</sub> ·6H <sub>2</sub> O |
| B3     | 45                 | 15: 1                  | 5            | 11.4 | Zn(NO <sub>3</sub> ) <sub>2</sub> ·6H <sub>2</sub> O |
| C3     | 65                 | 15: 1                  | 5            | 11.4 | Zn(NO <sub>3</sub> ) <sub>2</sub> ·6H <sub>2</sub> O |
| D3     | 85                 | 15: 1                  | 5            | 11.4 | Zn(NO <sub>3</sub> ) <sub>2</sub> ·6H <sub>2</sub> O |
| E3     | 95                 | 15: 1                  | 5            | 11.4 | Zn(NO <sub>3</sub> ) <sub>2</sub> ·6H <sub>2</sub> O |

**Table S4 Synthesize ZIF-8 with different reaction time**

| Sample | Time<br>/min | H <sub>2</sub> O/ Hmim | Temperature<br>/°C | pH   | Zinc source                                          |
|--------|--------------|------------------------|--------------------|------|------------------------------------------------------|
| A4     | 5            | 15: 1                  | 25                 | 11.4 | Zn(NO <sub>3</sub> ) <sub>2</sub> ·6H <sub>2</sub> O |
| B4     | 10           | 15: 1                  | 25                 | 11.4 | Zn(NO <sub>3</sub> ) <sub>2</sub> ·6H <sub>2</sub> O |
| C4     | 30           | 15: 1                  | 25                 | 11.4 | Zn(NO <sub>3</sub> ) <sub>2</sub> ·6H <sub>2</sub> O |
| D4     | 60           | 15: 1                  | 25                 | 11.4 | Zn(NO <sub>3</sub> ) <sub>2</sub> ·6H <sub>2</sub> O |
| E4     | 360          | 15: 1                  | 25                 | 11.4 | Zn(NO <sub>3</sub> ) <sub>2</sub> ·6H <sub>2</sub> O |
| F4     | 720          | 15: 1                  | 25                 | 11.4 | Zn(NO <sub>3</sub> ) <sub>2</sub> ·6H <sub>2</sub> O |
| G4     | 1440         | 15: 1                  | 25                 | 11.4 | Zn(NO <sub>3</sub> ) <sub>2</sub> ·6H <sub>2</sub> O |

**Table S5 Synthesize ZIF-8 with different molar ratio of Zn/Hmm/H<sub>2</sub>O**

| Sample | H <sub>2</sub> O/<br>Hmim | Temperature<br>/°C | Time<br>/min | pH   | Zinc source                                          |
|--------|---------------------------|--------------------|--------------|------|------------------------------------------------------|
| A5     | 15: 1                     | 25                 | 5            | 11.4 | Zn(NO <sub>3</sub> ) <sub>2</sub> ·6H <sub>2</sub> O |
| B5     | 25: 1                     | 25                 | 5            | 11.4 | Zn(NO <sub>3</sub> ) <sub>2</sub> ·6H <sub>2</sub> O |
| C5     | 40: 1                     | 25                 | 5            | 11.4 | Zn(NO <sub>3</sub> ) <sub>2</sub> ·6H <sub>2</sub> O |
| D5     | 50: 1                     | 25                 | 5            | 11.4 | Zn(NO <sub>3</sub> ) <sub>2</sub> ·6H <sub>2</sub> O |
| E5     | 100: 1                    | 25                 | 5            | 11.4 | Zn(NO <sub>3</sub> ) <sub>2</sub> ·6H <sub>2</sub> O |

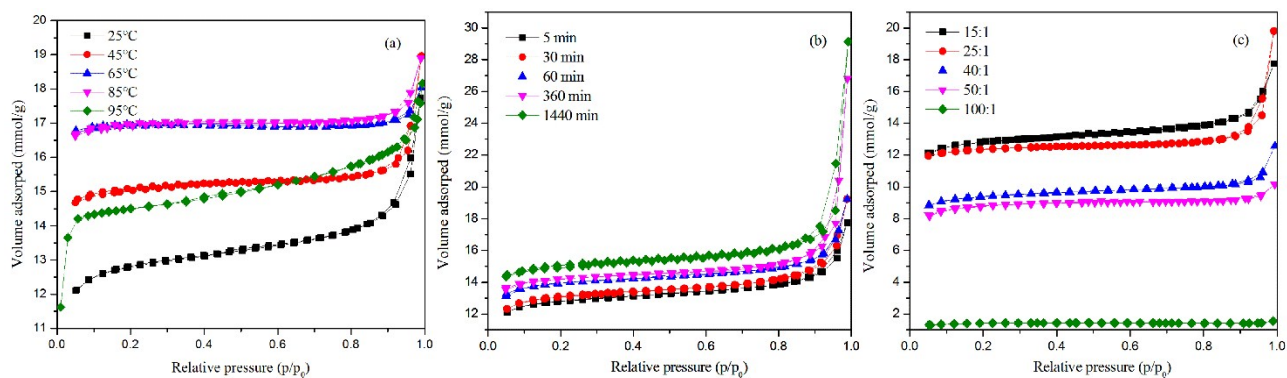

**Figure. S1.** BET of ZIF-8 synthesized under different reaction condition: a) temperature: 25°C, 45°C, 65°C, 85°C, 95°C; b) time: 5 min, 30 min, 60 min, 360 min, 1440 min; c) the concentration of water in the ligand (H<sub>2</sub>O / Hmim).

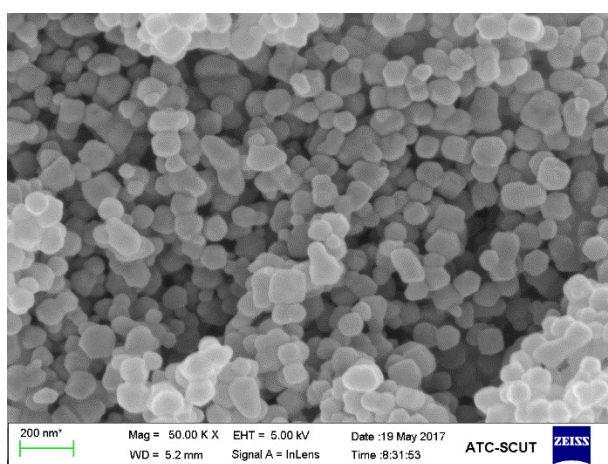

**Figure. S2** SEM images of ZIF-8 synthesized 95 °C

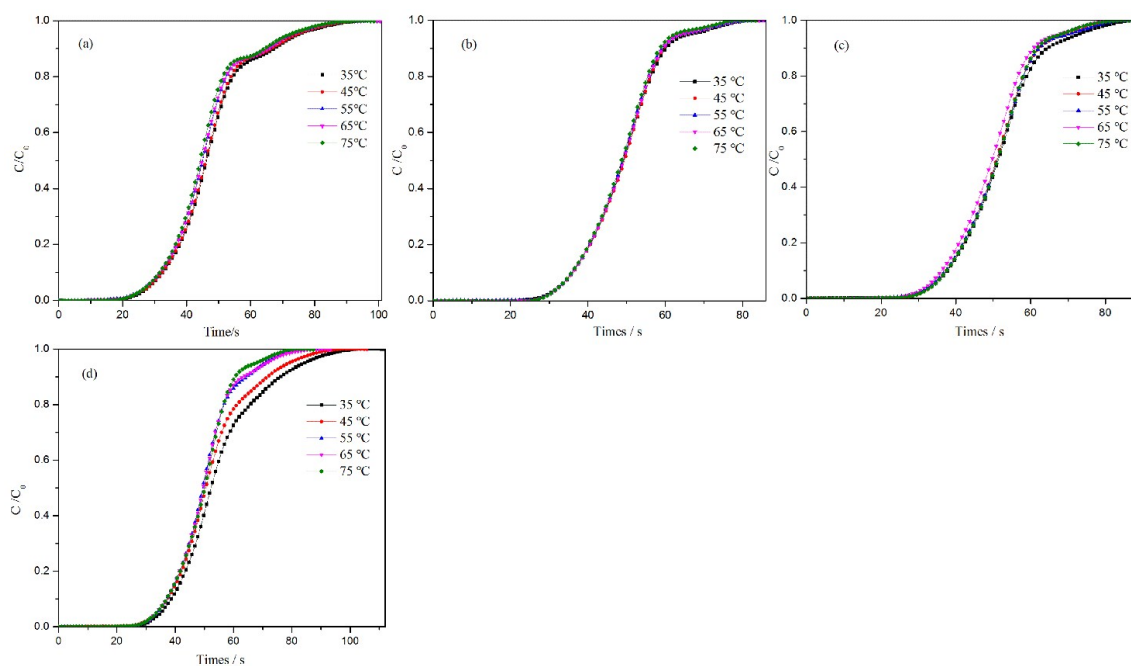

**Figure. S3.** Breakthrough curves from 35 °C to 75 °C of ZIF-8 synthesized under different temperature (a: 45 °C, b: 65 °C, c: 85 °C, d: 95 °C).

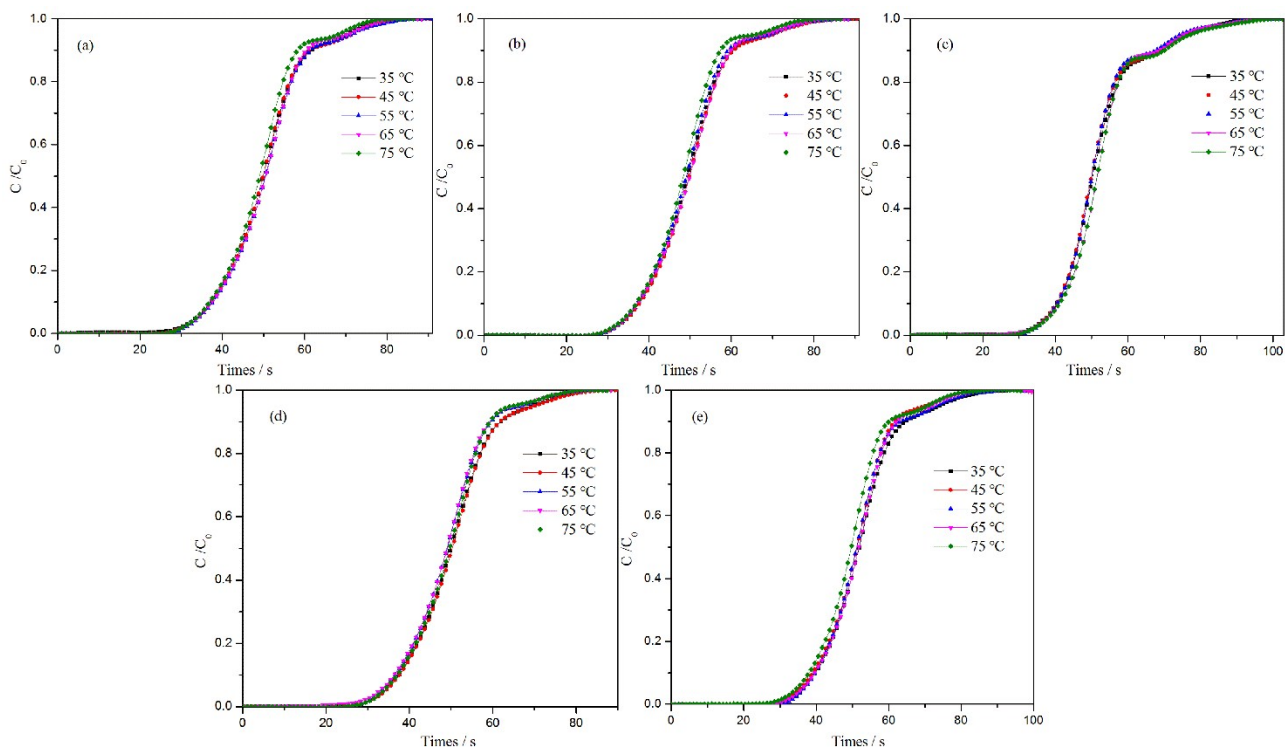

**Figure. S4.** Breakthrough curves from 35 °C to 75 °C of ZIF-8 synthesized with different time (a: 5 min, b: 30 min, c: 60 min, d: 360 min, e: 1440 min).

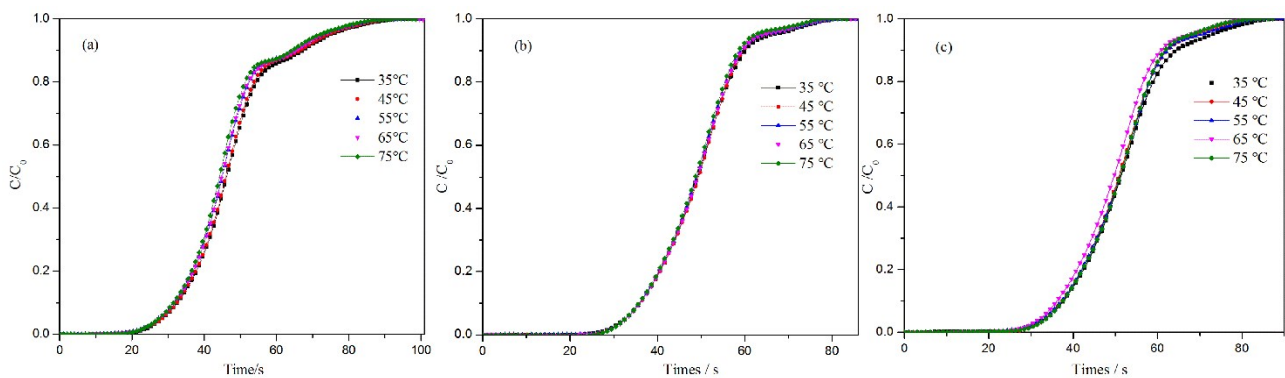

**Figure. S5.** Breakthrough curves from 35 °C to 75 °C of ZIF-8 synthesized with different concentration of water in the ligand ( $\text{H}_2\text{O}$  / Hmim) (a. 15:1, b. 40:1, c. 50:1).
